# Supplementary material for: On the Origin of the Blue Color in The Iodine/Iodide/Starch Supramolecular Complex
Source: MDPI journal article supplement (doi:10.3390/molecules27248974), 2022-12-16
Supplement: s1 [file s1]

**On the origin of the blue color in the iodine / iodide / starch supramolecular complex**

Szilárd Pesek, Maria Lehene, Adrian M.V. Brânzanic, Radu Silaghi-Dumitrescu

*Department of Chemistry, Babeş-Bolyai University, 11 Arany Janos str, Cluj-Napoca 400028, Romania*

*Iodine experiments*

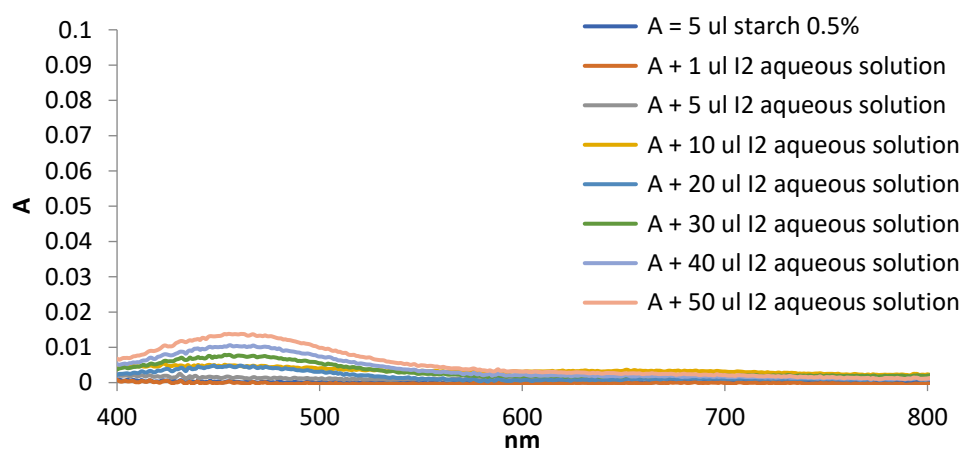

**Figure S1.** UV-vis spectra of starch – I<sub>2</sub> mixtures. Conditions: 5 µL starch 0.5%, to which indicated amounts of I<sub>2</sub> aqueous solution were added.

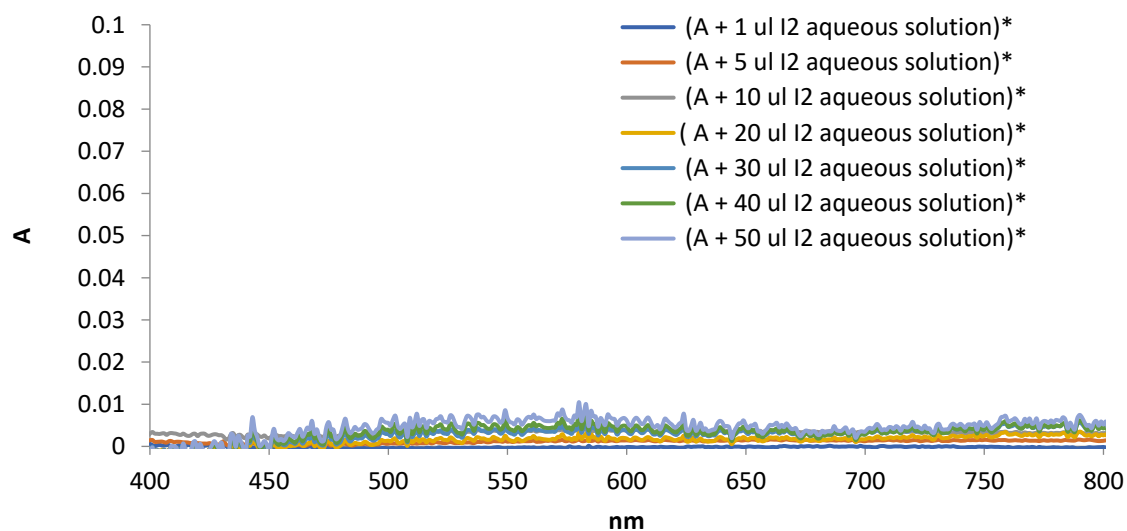

**Figure S2.** Same data as in Figure S1, after subtracting the from each spectrum the corresponding spectrum of a starch-free  $I_2$  aqueous solution of the same concentration.

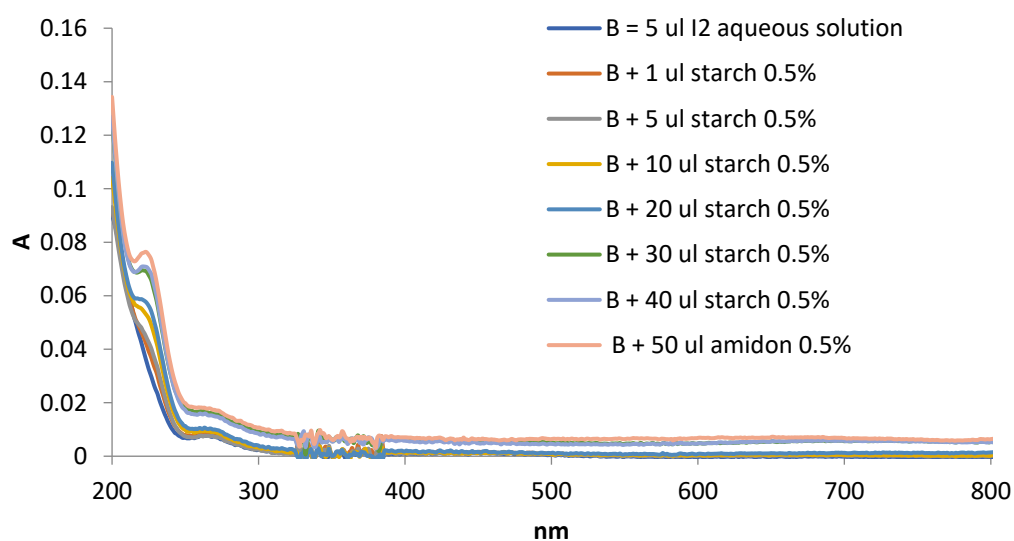

**Figure S3.** UV-vis spectra of an  $I_2$  aqueous solution, to which indicated amounts of starch 0.5% solution were added.

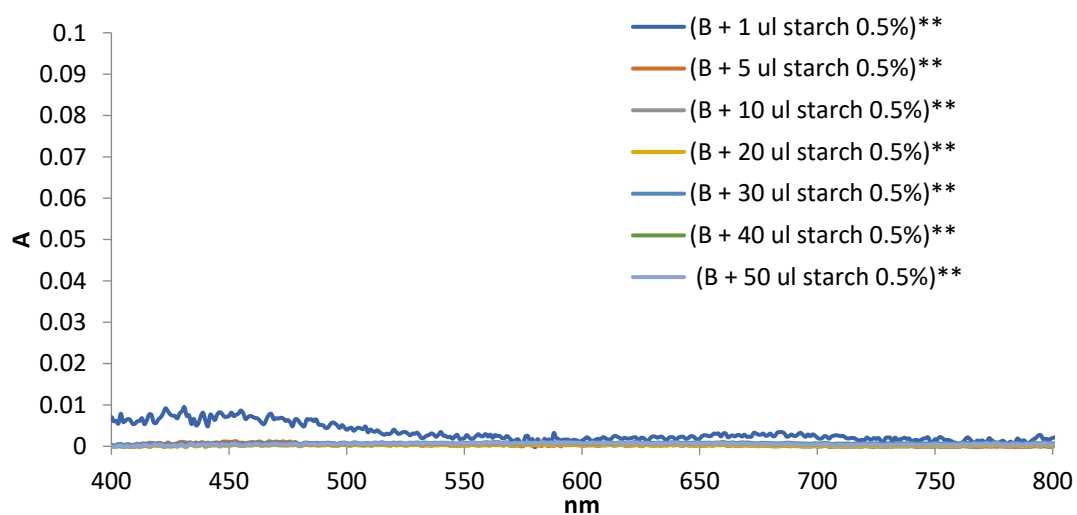

**Figure S4.** Corrections made to spectra from Figure S3 by subtracting the control spectra of starch at indicated concentrations.

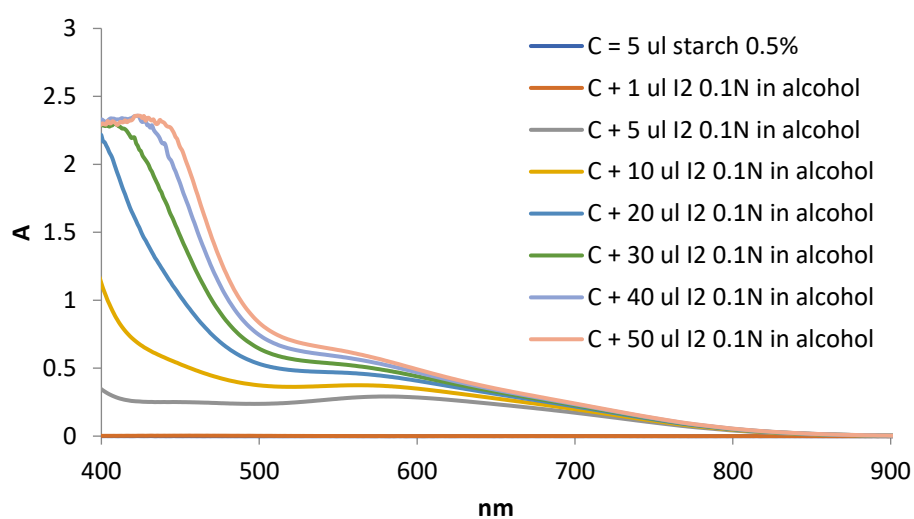

**Figure S5.** UV-vis spectra of starch 0.5%, to which different amounts of solution of  $I_2$  0.1N in alcohol were added.

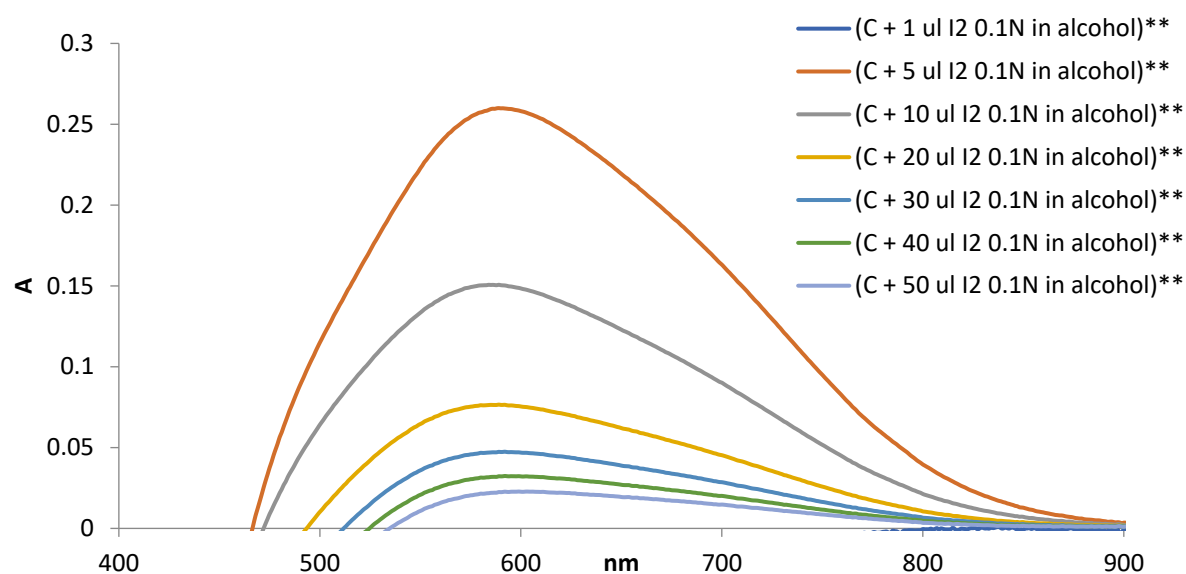

**Figure S6.** Corrections made to spectra from Figure S5 by subtracting the control spectra of I<sub>2</sub> at indicated concentrations.

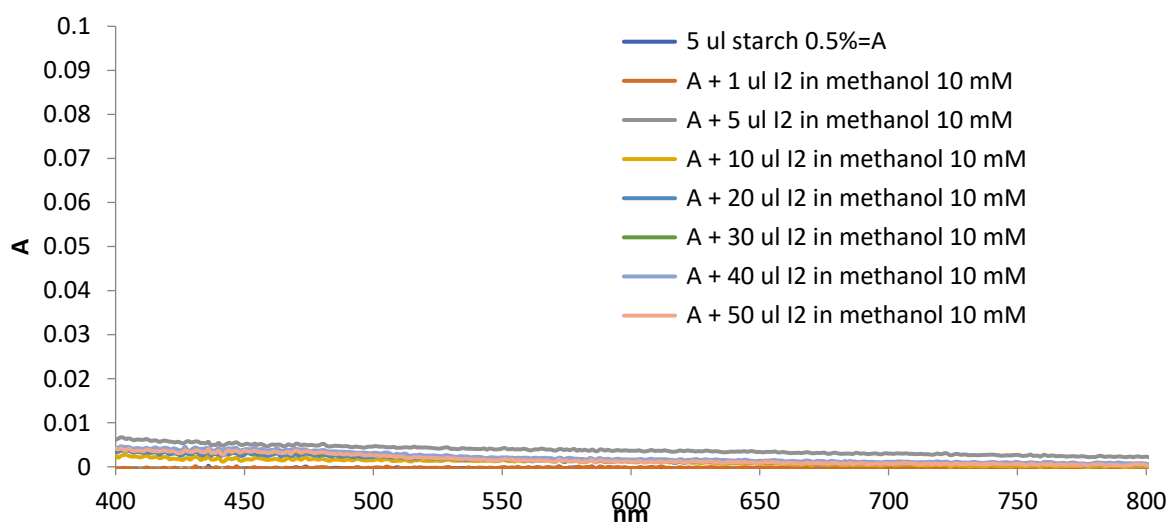

**Figure S7.** UV-vis spectra of starch 0.5%, to which indicated amounts of solution I<sub>2</sub> in methanol 10 mM were added.

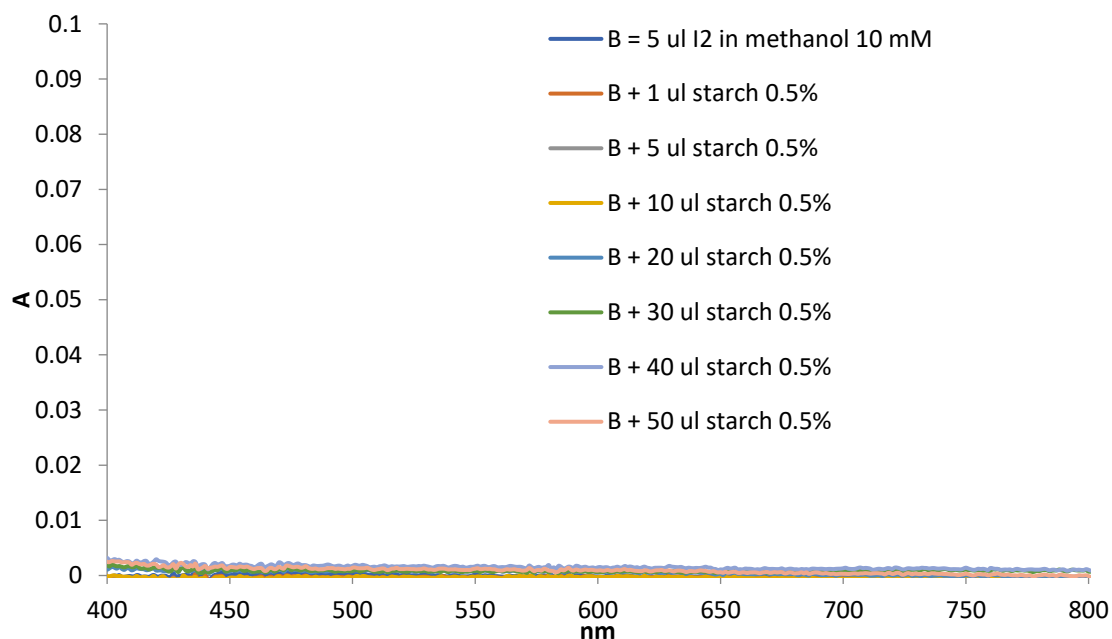

**Figure S8.** UV-vis spectra of water, to which  $I_2$  from a 10 mM stock solution was added, followed by indicated amounts of 0.5% starch solution.

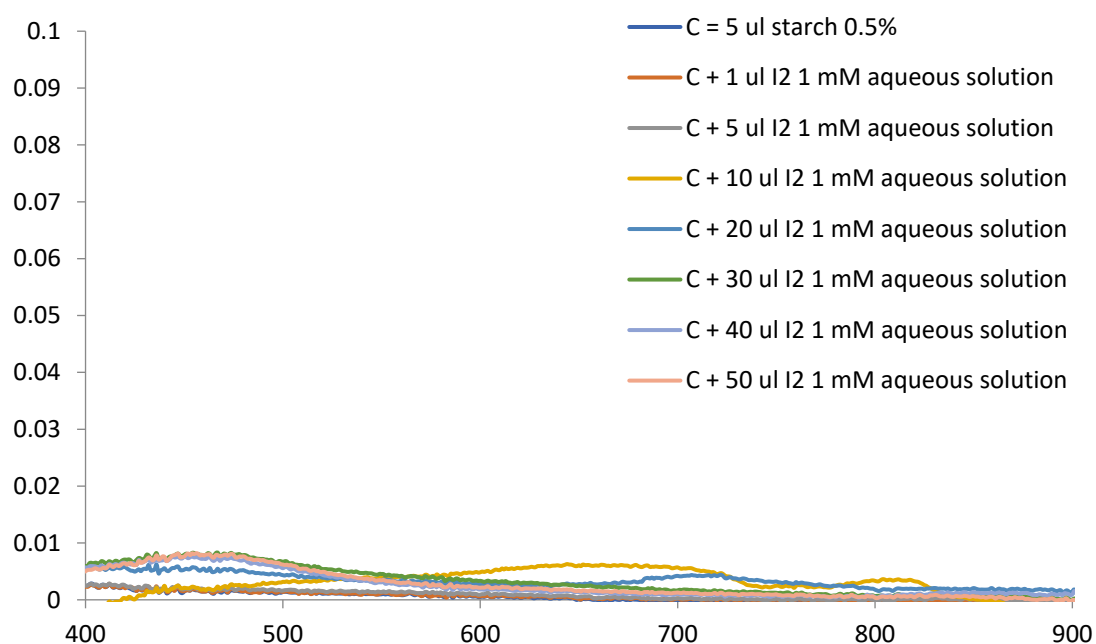

**Figure S9.** UV-vis spectra of starch solutions to which indicated amounts of  $I_2$  1 mM aqueous solution were added.

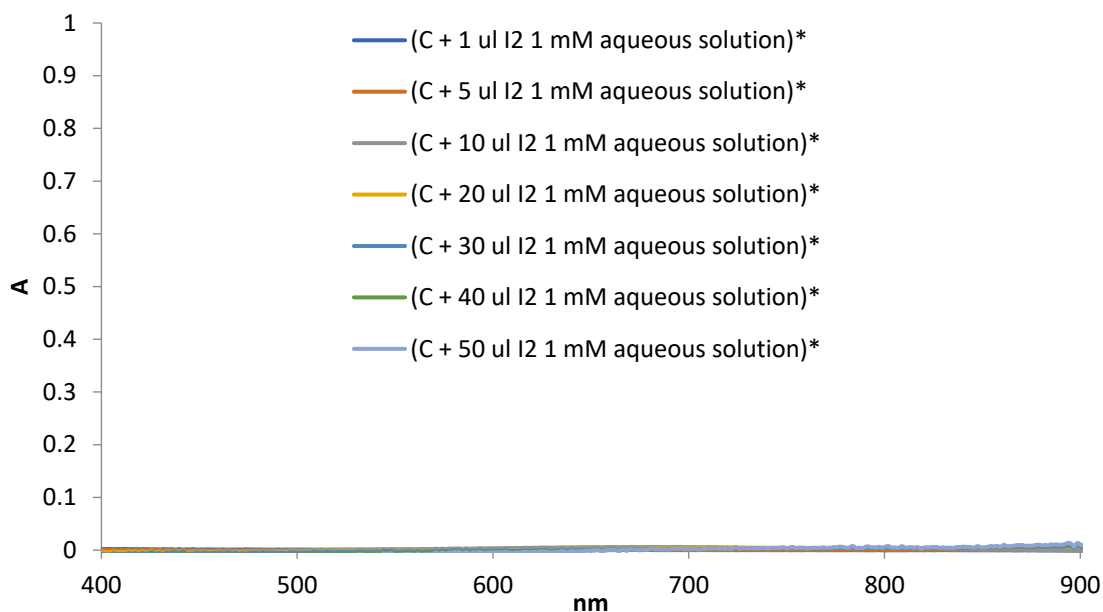

**Figure S10.** Corrections made to spectra from Figure S9 by subtracting the control spectra of  $I_2$  at indicated concentrations.

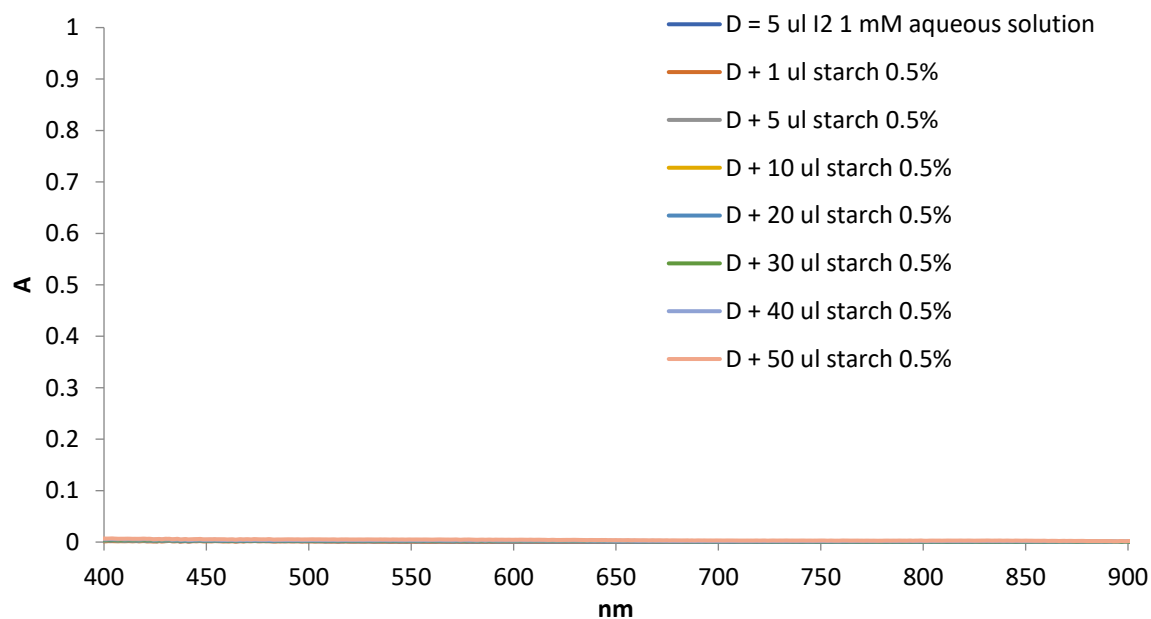

**Figure S11.** UV-vis spectra of a 1 mM  $I_2$  aqueous solution, to which indicated amounts of starch 0.5% solution were added.

## Experiments with iodine-iodide

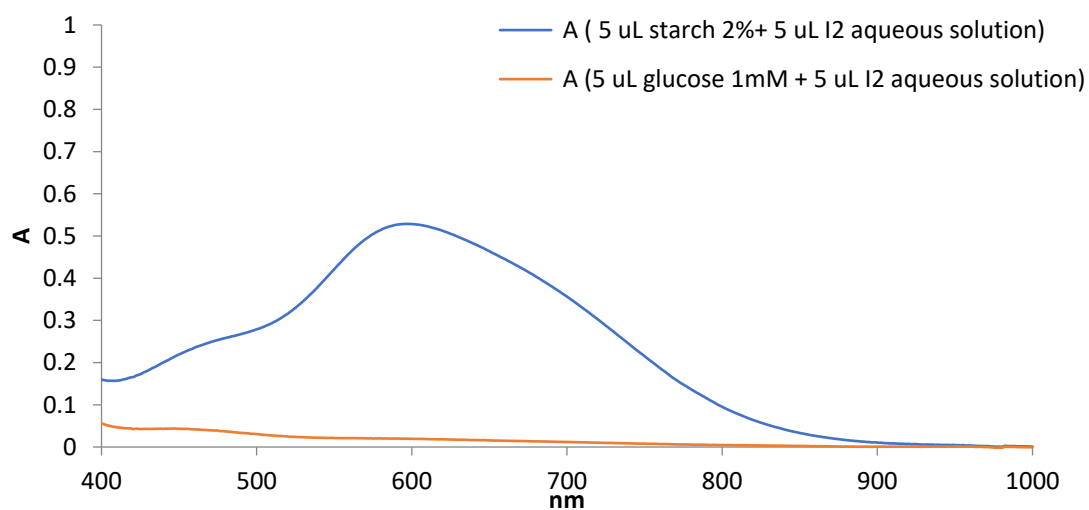

**Figure S12.** UV-vis spectra of starch 2% / glucose 1 mM to which 5  $\mu$ L solution of iodine-iodide aqueous solution were added.

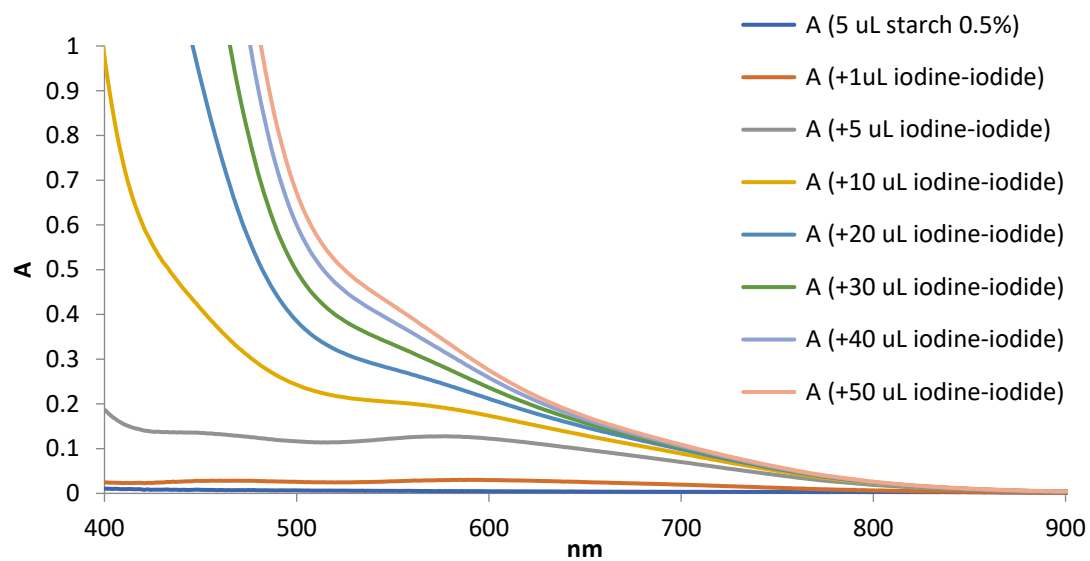

**Figure S13.** UV-vis spectra of starch 0.5%, to which iodine-iodide was added.

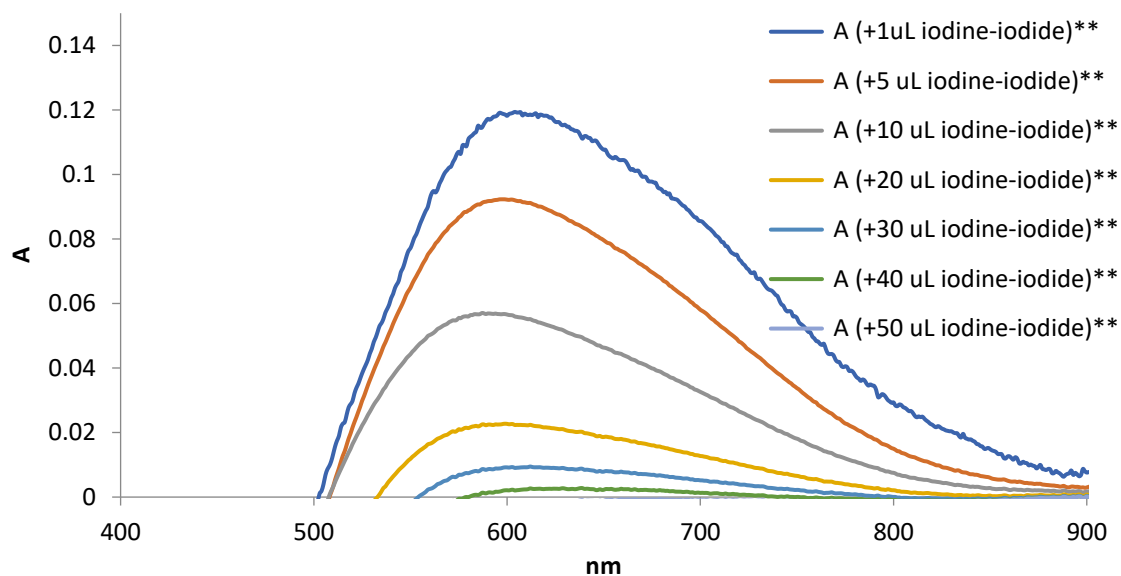

**Figure S14.** Same spectra as in Figure S13, now corrected by subtracting the control spectra of iodine-iodide solutions collected in the absence of starch.

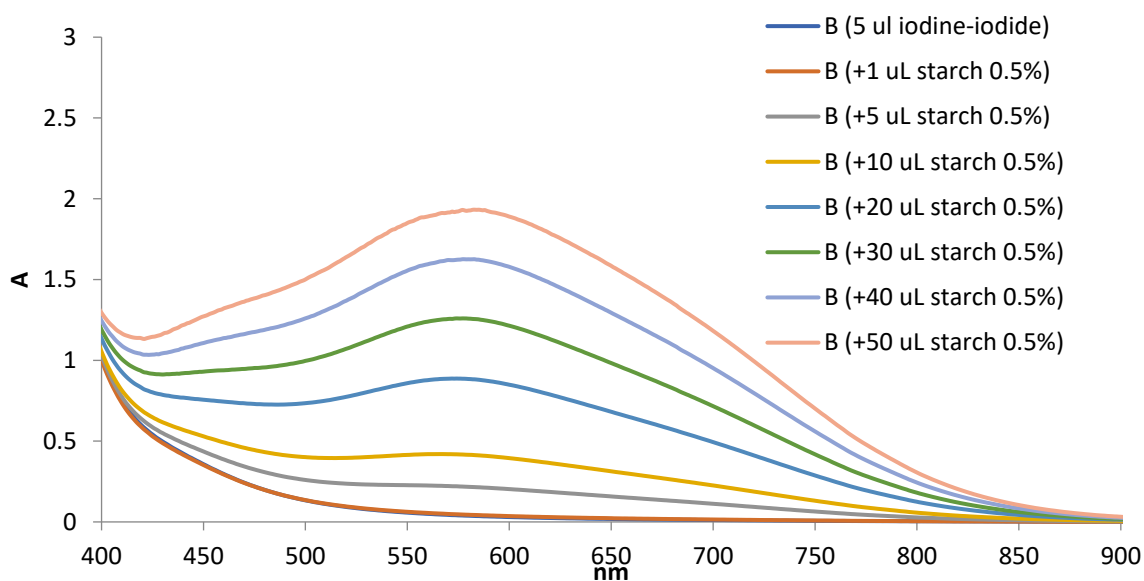

**Figure S15.** – UV-vis spectra of an iodine-iodide aqueous solution to which indicated amounts of starch 0.5% solution were added.



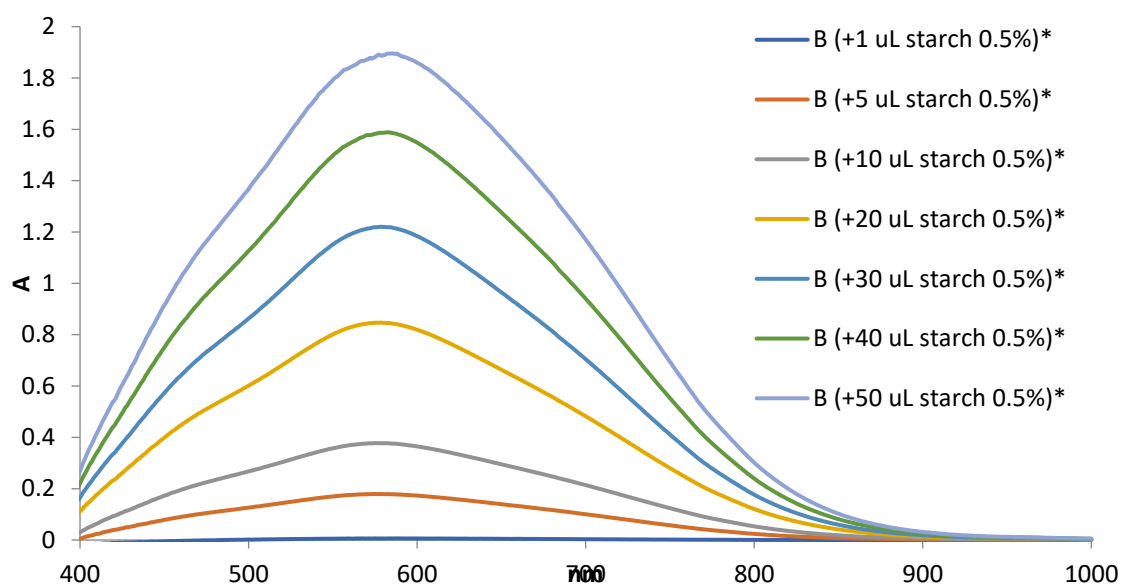

**Figure S16.** Same spectra as in Figure S15, now corrected by subtracting the control spectra of starch solutions collected in the absence of iodine.

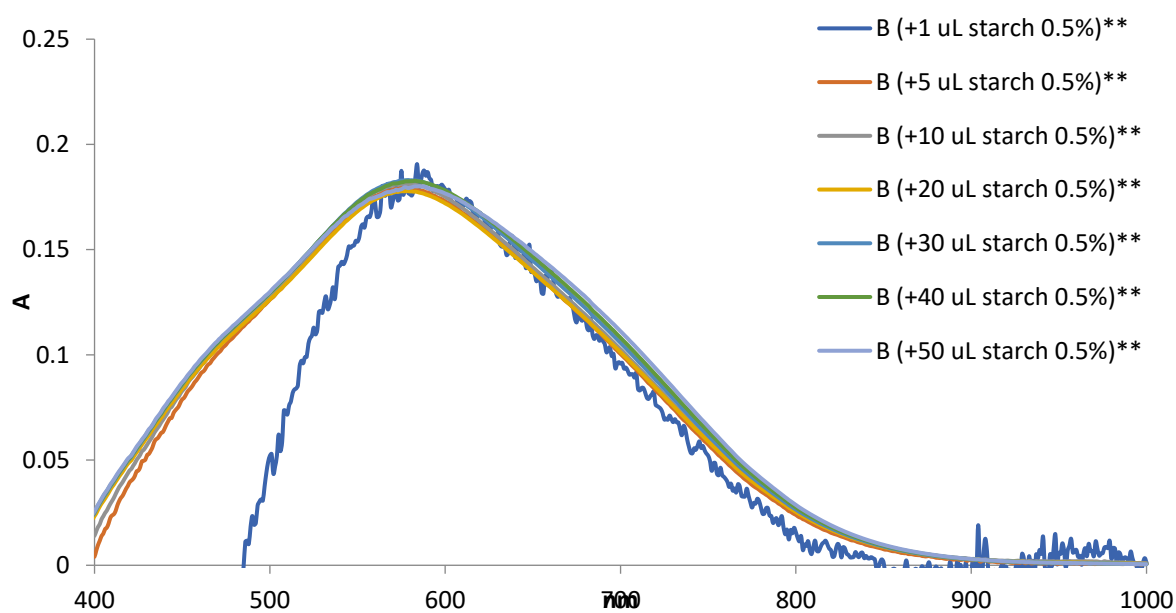

**Figure S17.** Same spectra as in Figure 16, multiplied by arbitrary constants each, so that a clearer comparison of the shapes of the maxima can be offered.

## Experiments with amylase

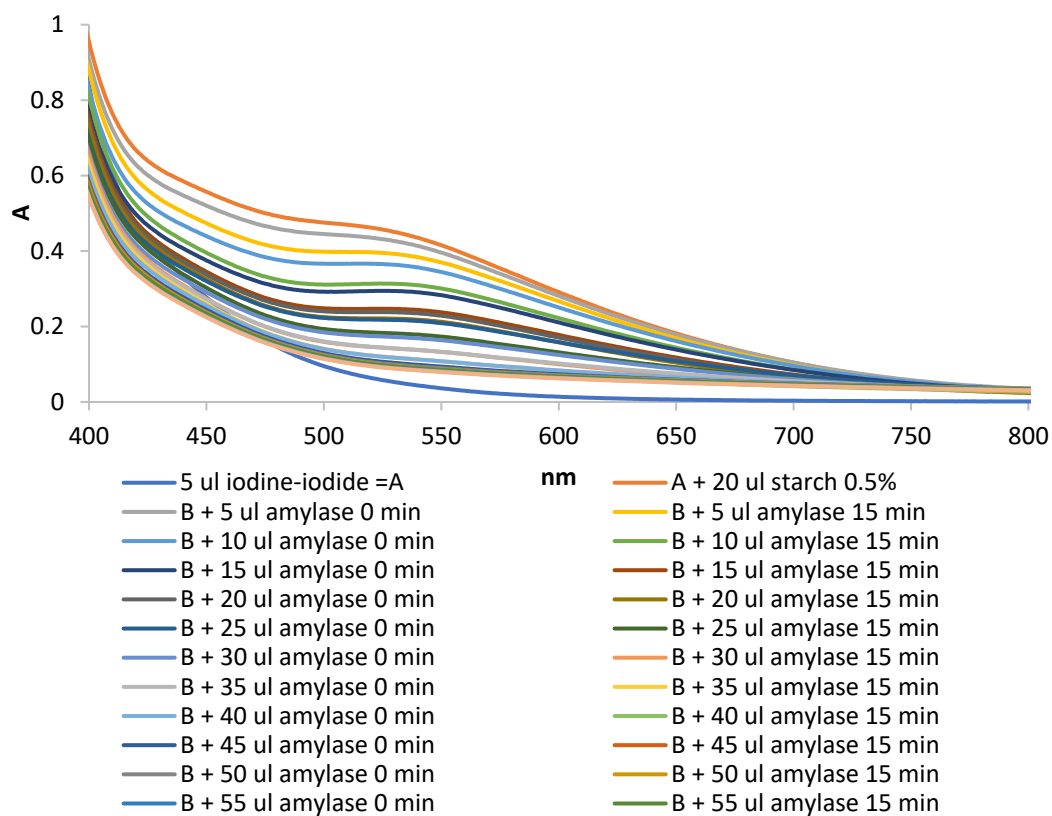

**Figure S18.** Time evolution of UV-vis spectra of an iodine-iodide mixture, to which starch and amylase were added.

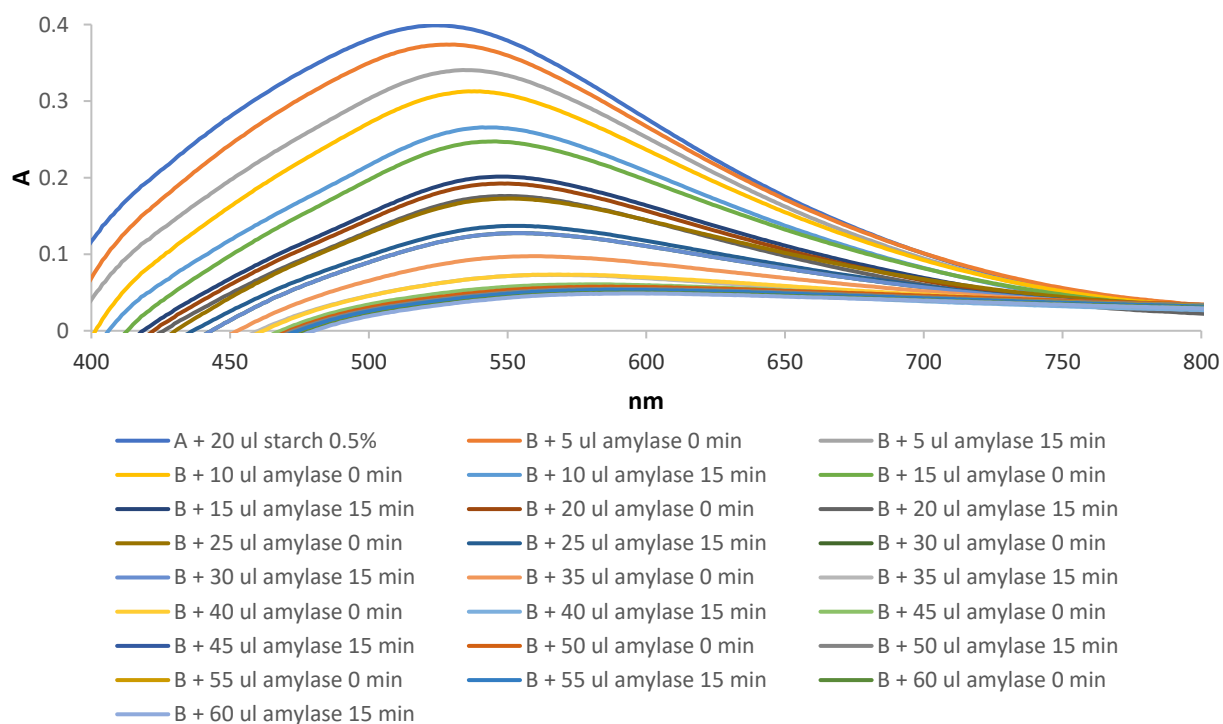

**Figure S19.** Same spectra as in Figure S18, now corrected by subtracting the control spectrum of the iodine-iodide solution.

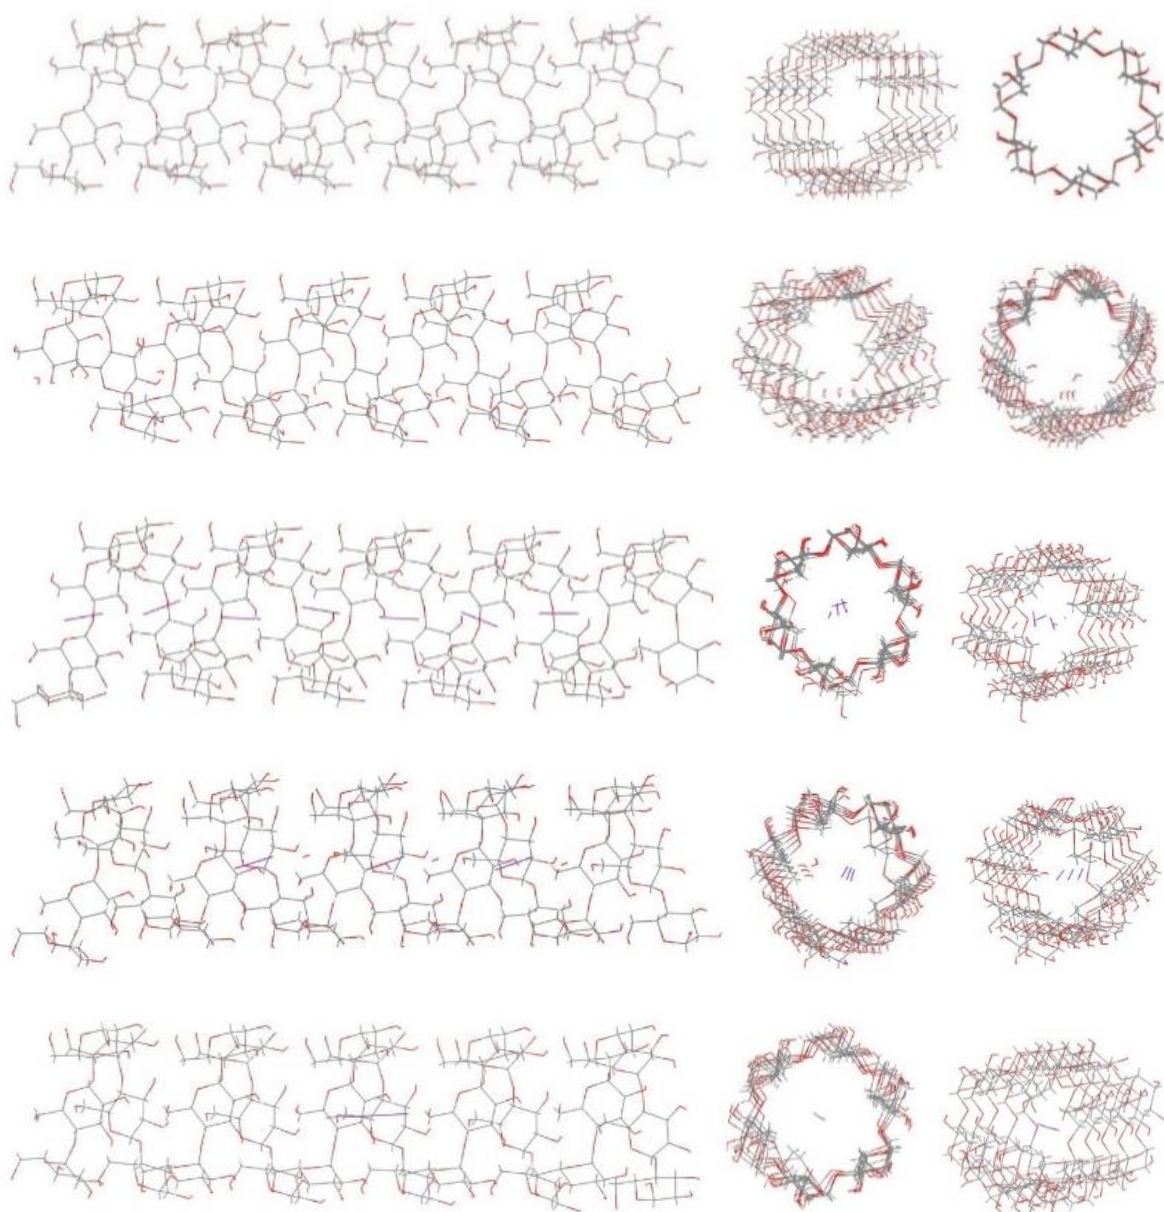

**Figure S20.** - Structures of AM1-optimized amylose models, in order of rows: A, A-H<sub>2</sub>O, A-I<sub>2</sub>, A-I<sub>2</sub>-H<sub>2</sub>O, A-I<sub>3</sub>.

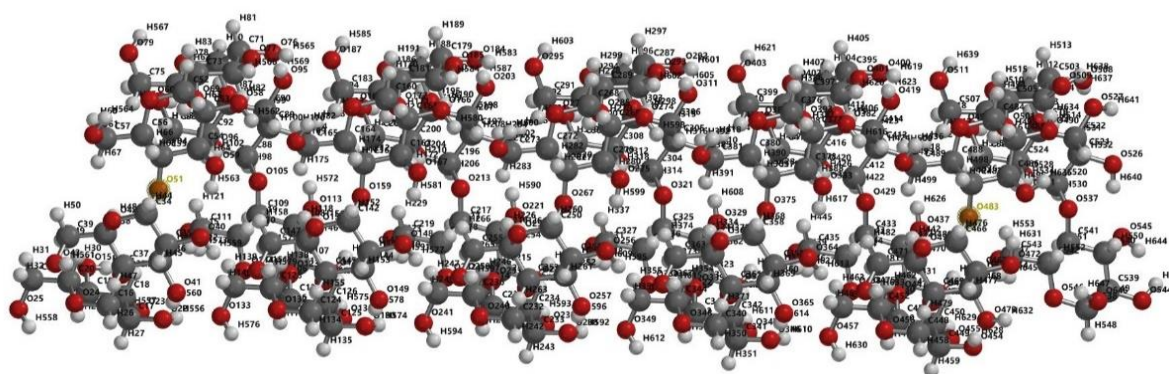

O51-O483

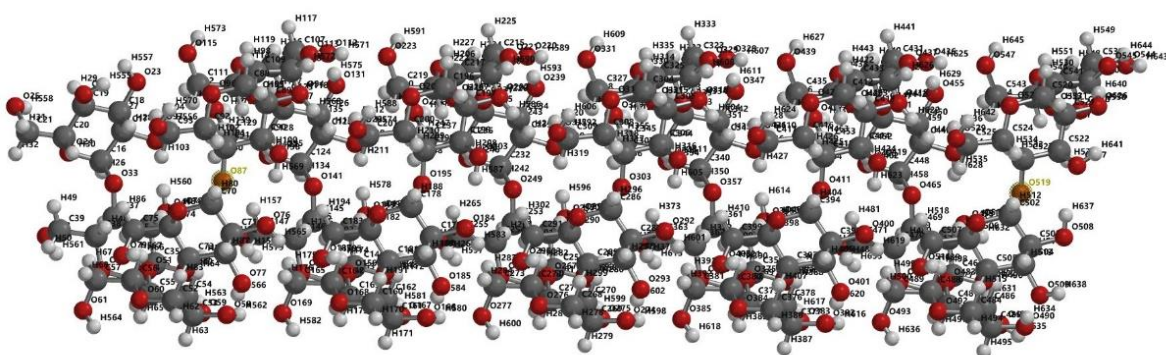

O87-O519

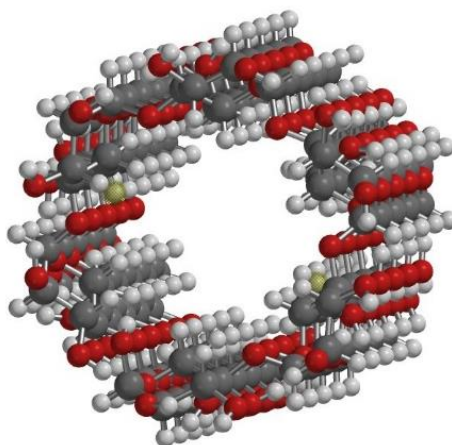

H424-H481

**Figure S21.** Structure of the amylose model helix, showing in yellow highlight the atoms employed for estimating the changes in helix length/diameter (as discussed in main text, Table 1).

**Table S1.** Key distances (Å) derived computed for iodine-amylose models. The starting geometry of the A models featured a length of 32.69 Å (measured from O51 to O483 and O87 to O519) and a diameter of 7.04 Å (measured from H424 to H481, cf. Supporting Information).

| Model                              | Helix length | Helix diameter | I-I distances                                                                                                                           |
|------------------------------------|--------------|----------------|-----------------------------------------------------------------------------------------------------------------------------------------|
| I <sub>2</sub>                     | -            | -              | 2.54                                                                                                                                    |
| I <sub>3</sub> <sup>-</sup>        | -            | -              | 2.62                                                                                                                                    |
| (I <sub>2</sub> ) <sub>3</sub>     | -            | -              | Intramolecular: 2.55 / 2.55 / 2.55<br>Intermolecular: 2.94 / 2.94                                                                       |
| A                                  | 32.90        | 7.15           | -                                                                                                                                       |
| A-H <sub>2</sub> O                 | 34.38        | 7.82           | -                                                                                                                                       |
| A-I <sub>2</sub>                   | 33.08        | 7.44           | Intramolecular: 2.55 / 2.56 / 2.56 / 2.56 / 2.56 / 2.56 / 2.55<br>Intermolecular: 2.85 / 2.84 / 2.84 / 2.83 / 2.83 / 2.84               |
| A-I <sub>2</sub> -H <sub>2</sub> O | 34.00        | 7.89           | Intramolecular: 2.65 / 2.65 / 2.65<br>Inter-I <sub>2</sub> : 7.60 / 5.80<br>H <sub>2</sub> O-I: 4.56 / 5.09 / 3.92 / 3.92 / 3.79 / 3.93 |
| A-I <sub>3</sub> <sup>-</sup>      | 34.04        | 7.14           | 2.65 / 2.65                                                                                                                             |

**Table S2.** AM1 energies (kcal/mol) of amylose models employed in the present study.

|                                    | Energy  | Total interaction energy | Interaction energy per small molecule |
|------------------------------------|---------|--------------------------|---------------------------------------|
| H <sub>2</sub> O                   | -59.2   | -                        | -                                     |
| I <sub>2</sub>                     | 19.8    | -                        | -                                     |
| I <sub>3</sub> <sup>-</sup>        | -42.3   | -                        | -                                     |
| (I <sub>2</sub> ) <sub>3</sub>     | 49.4    | -10.0                    | -3.3                                  |
| A                                  | -7224.1 | -                        | -                                     |
| A-H <sub>2</sub> O                 | -7547.8 | -27.7                    | -5.5                                  |
| A-I <sub>2</sub>                   | -7083.0 | 2.5                      | 0.4                                   |
| A-I <sub>2</sub> -H <sub>2</sub> O | -7406.2 | -4.7                     | -0.7                                  |
| A-I <sub>3</sub> <sup>-</sup>      | -7275.6 | -9.2                     | -9.2                                  |

**Table S3.** Solvent effects on TD-DFT-predicted maxima and oscillator strengths for selected iodine/iodide models.

| Model                                                         | $\epsilon$ (solvent)  | Wavelength (nm) | Oscillator strength |
|---------------------------------------------------------------|-----------------------|-----------------|---------------------|
| I <sub>2</sub>                                                | 1.0 (vacuum)          | 588             | 0.0015              |
| I <sub>2</sub>                                                | 9.1 (dichloromethane) | 608             | 0.0014              |
| (I <sub>2</sub> ) <sub>2</sub>                                | 1.0 (vacuum)          | 692             | 0.0019              |
| (I <sub>2</sub> ) <sub>2</sub>                                | 9.1 (dichloromethane) | 646             | 0.0019              |
| I <sub>3</sub> <sup>-</sup>                                   | 1.0 (vacuum)          | 372             | 0.0000              |
| I <sub>3</sub> <sup>-</sup>                                   | 9.1 (dichloromethane) | 365             | 0.0000              |
| I <sub>5</sub> <sup>-</sup>                                   | 1.0 (vacuum)          | 365             | 0.0007              |
| I <sub>5</sub> <sup>-</sup>                                   | 9.1 (dichloromethane) | 360             | 0.0007              |
| I <sub>2</sub> --I <sub>3</sub> <sup>-</sup> --I <sub>2</sub> | 1.0 (vacuum)          | 680             | 1.5507              |
| I <sub>2</sub> --I <sub>3</sub> <sup>-</sup> --I <sub>2</sub> | 2.3 (benzene)         | 648             | 1.5668              |
| I <sub>2</sub> --I <sub>3</sub> <sup>-</sup> --I <sub>2</sub> | 9.1 (dichloromethane) | 566             | 1.4483              |
| I <sub>2</sub> --I <sub>3</sub> <sup>-</sup> --I <sub>2</sub> | 32.7 (methanol)       | 541             | 1.4483              |
| I <sub>2</sub> --I <sub>3</sub> <sup>-</sup> --I <sub>2</sub> | 80.0 (water)          | 537             | 1.3979              |
| I <sub>2</sub> —I <sub>5</sub> <sup>-</sup> --I <sub>2</sub>  | 1.0 (vacuum)          | 681             | 1.9297              |
| I <sub>2</sub> —I <sub>5</sub> <sup>-</sup> --I <sub>2</sub>  | 9.1 (dichloromethane) | 548             | 2.2216              |
| I <sub>2</sub> —I <sub>5</sub> <sup>-</sup> --I <sub>2</sub>  | 32.7 (methanol)       | 527             | 2.1917              |
